# Supplementary material for: Evaluation of Oromucosal Natural Gum-Based Emulgels as Novel Strategy for Photodynamic Therapy of Oral Premalignant Lesions
Source: MDPI journal article supplement (doi:10.3390/pharmaceutics15102512), 2023-10-23
Supplement: s1 [file s1]

## Supplementary Material

*Article*

# Evaluation of Oromucosal Natural Gum-Based Emulgels as Novel Strategy for Photodynamic Therapy of Oral Premalignant Lesions

Emilia Szymańska <sup>1,\*</sup>, Joanna Potaś <sup>1</sup>, Marcin Baranowski <sup>2</sup>, Robert Czarnomysy <sup>3</sup>, Magdalena Ewa Sulewska <sup>4</sup>,

Anna Basa <sup>5</sup>, Małgorzata Pietruska <sup>4</sup>, Krzysztof Bielawski <sup>3</sup> and Katarzyna Winnicka <sup>1</sup>

<sup>1</sup> Department of Pharmaceutical Technology, Medical University of Białystok, Mickiewicza 2c, 15-222 Białystok, Poland; joanna.potas@umb.edu.pl (J.P.); katarzyna.winnicka@umb.edu.pl (K.W.)

<sup>2</sup> Department of Physiology, Medical University of Białystok, Mickiewicza 2c, 15-222 Białystok, Poland; marcin.baranowski@umb.edu.pl

<sup>3</sup> Department of Synthesis and Technology of Drugs, Medical University of Białystok, Jana Kilińskiego 1, 15-089 Białystok, Poland; robert.czarnomysy@umb.edu.pl (R.C.); krzysztof.bielawski@umb.edu.pl (K.B.)

<sup>4</sup> Department of Periodontal and Oral Mucosa Diseases, Medical University of Białystok, ul. Waszyngtona 13, 15-269 Białystok, Poland; magdalena.sulewska@umb.edu.pl (M.E.S.); mpietruska@wp.pl (M.P.)

<sup>5</sup> Faculty of Chemistry, University of Białystok, Ciołkowskiego 1K, 15-245 Białystok, Poland; abasa@uwb.edu.pl

\* Correspondence: emilia.szymanska@umb.edu.pl; Tel.: +48-8574-856-16

### Controls

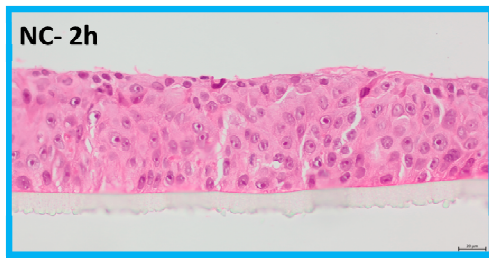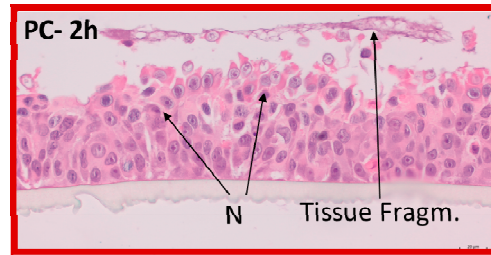

### Drug-free preparations

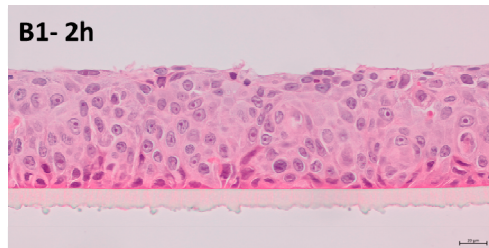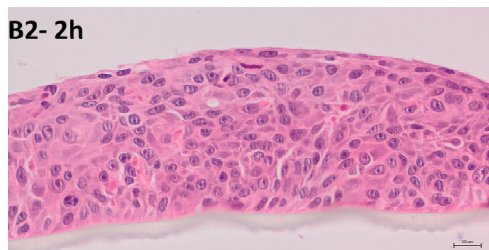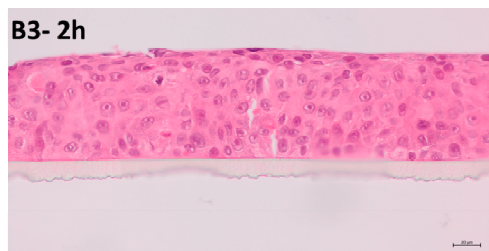

### Drug-loaded preparations

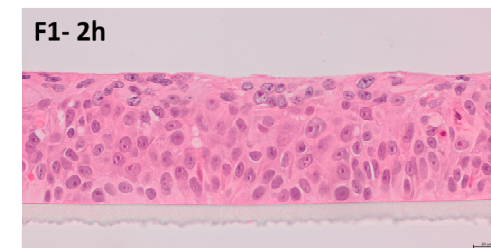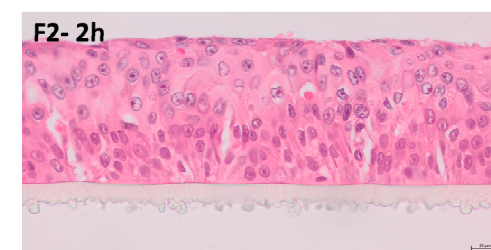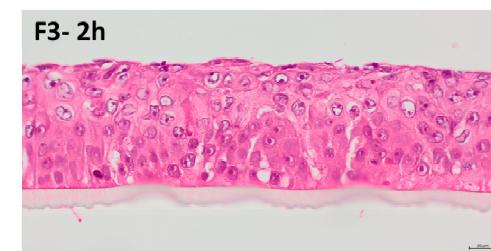

(A)

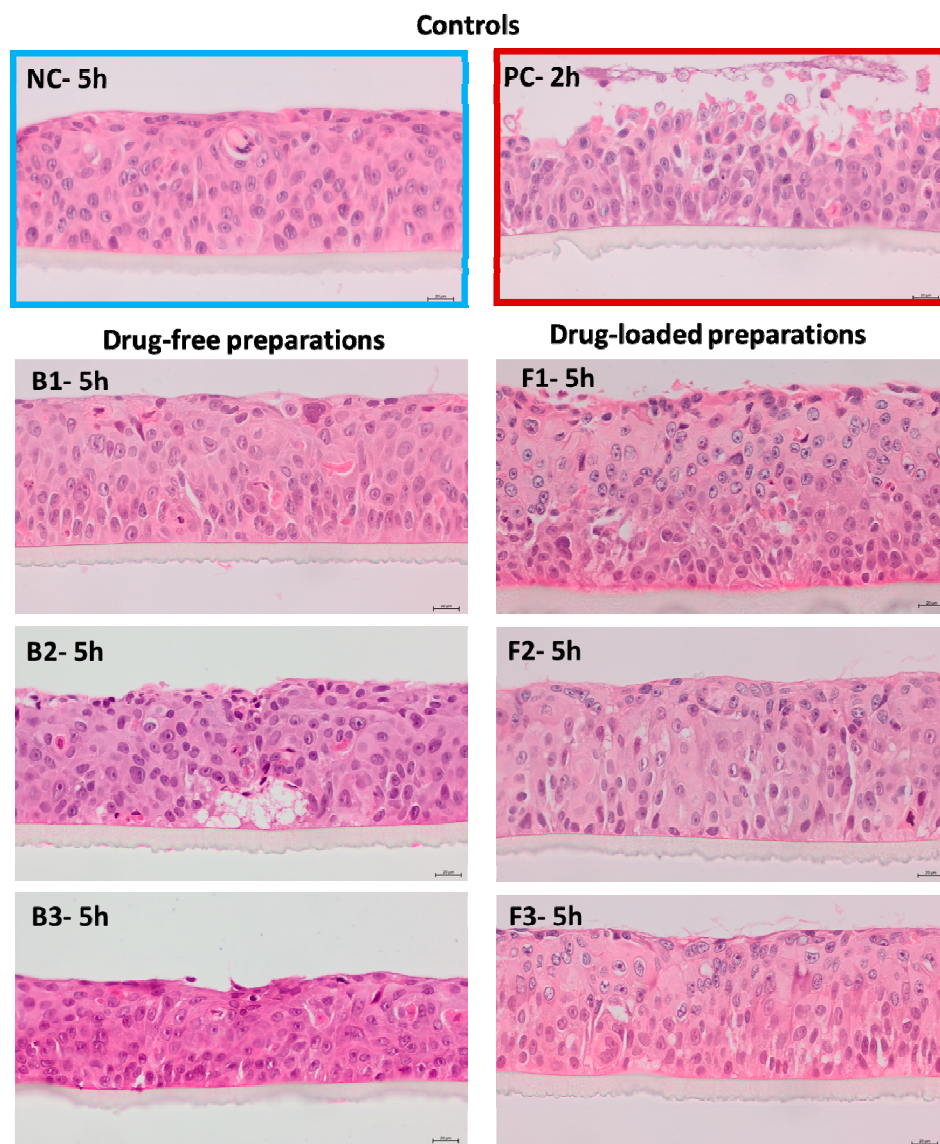

(B)

**Figure S1.** H&E staining of the representative histopathological sections of the human oral epithelium model after: (A) 2h, (B) 5h incubation with ALA-loaded emulgels (F1-F3) and corresponded drug-free formulations (B1-B3) compared to negative control (NC, water treated tissue) and positive control (PC, SDS treated tissue). Tissue Fragn. – tissue fragmentation; N – necrotic cell.
